1  
2  
3  
4  
5  
6  
7  
8  
9  
10  
11  
12  
13  
14  
15  
16  
17  
18  
19  
20  
21  
22  
23  
24  
25

## Dynamic dot displays reveal material motion network in the human brain

Authors:

Alexandra C. Schmid<sup>1,3</sup>

Huseyin Boyaci<sup>1,2</sup>

Katja Doerschner<sup>1,2</sup>

<sup>1</sup> Department of Psychology, Justus Liebig University Giessen, Giessen 35394, Germany

<sup>2</sup> Department of Psychology, A.S. Brain Research Center, and National Magnetic Resonance Research Center, Bilkent University, Ankara 06800, Turkey

<sup>3</sup> Present address: Laboratory of Brain and Cognition, National Institute of Mental Health, National Institutes of Health, Bethesda, MD 20892, USA

Correspondence:

Alexandra.Schmid@psychol.uni-giessen.de (A.C.S.);

hboyaci@bilkent.edu.tr (H.B.);

Katja.Doerschner@psychol.uni-giessen.de (K.D.)

26 **ABSTRACT**

27 There is growing research interest in the neural mechanisms underlying the recognition of  
28 material categories and properties. This research field, however, is relatively more recent and  
29 limited compared to investigations of the neural mechanisms underlying object and scene  
30 category recognition. Motion is particularly important for the perception of non-rigid materials,  
31 but the neural basis of non-rigid material motion remains unexplored. Using fMRI, we  
32 investigated which brain regions respond preferentially to material motion versus other types  
33 of motion. We introduce a new database of stimuli – dynamic dot materials – that are  
34 animations of moving dots that induce vivid percepts of various materials in motion, e.g.  
35 flapping cloth, liquid waves, wobbling jelly. Control stimuli were scrambled versions of these  
36 same animations and rigid three-dimensional rotating dots. Results showed that isolating  
37 material motion properties with dynamic dots (in contrast with other kinds of motion) activates  
38 a network of cortical regions in both ventral and dorsal visual pathways, including areas  
39 normally associated with the processing of surface properties and shape, and extending to  
40 somatosensory and premotor cortices. We suggest that such a widespread preference for  
41 material motion is due to strong associations between stimulus properties. For example  
42 viewing dots moving in a specific pattern not only elicits percepts of material motion; one  
43 perceives a flexible, non-rigid shape, identifies the object as a cloth flapping in the wind, infers  
44 the object’s weight under gravity, and anticipates how it would feel to reach out and touch the  
45 material. These results are a first important step in mapping out the cortical architecture and  
46 dynamics in material-related motion processing.

47

48 Keywords: material perception, motion, fMRI, point-light motion, dynamic dot, structure from  
49 motion

## 50 **1. Introduction**

51 Recognizing and estimating the material qualities of objects is an essential part of our visual  
52 experience. Perceiving material qualities quickly and correctly is critical for guiding decisions or  
53 actions, whether we are deciding what fruit to eat, if a blanket is soft enough, or how we should  
54 grip a porcelain cup. Despite the importance of recognizing and estimating the properties of  
55 materials, it is still not well understood how the brain accomplishes these tasks. Most  
56 neuroscientific studies about material perception have focused on the cortical areas involved in  
57 the visual processing of material properties, with nearly all of those studies using static images  
58 as stimuli (see Komatsu & Goda, 2018 for a review). Although motion compellingly conveys the  
59 properties of non-rigid materials such as stiffness and elasticity (e.g. Schmid & Doerschner  
60 2018; Schmidt et al. 2017), the neural basis of non-rigid material motion remains unexplored.  
61 Here we investigate whether specialized dynamic dot animations portraying non-rigid material  
62 motion elicit meaningful differences in brain responses when compared to other kinds of  
63 motion using functional magnetic resonance imaging (fMRI).

64  
65 The use of static images when investigating the visual processing of materials is somewhat  
66 justified because, although material perception is a multisensory (Baumgartner et al. 2013),  
67 dynamic experience (Schmid & Doerschner, 2019), many material qualities can be conveyed  
68 through images alone (Paulun et al. 2017; Schmid & Doerschner, 2018; Schmidt et al. 2017; van  
69 Assen & Fleming 2016). Material properties that can be conveyed *directly* through visual  
70 information are so called optical properties. These properties, such as a surface's micro- and  
71 meso-structure, or its reflective-, transmissive- and refractive properties, give a material its  
72 characteristic visual appearance (e.g. glossy, plastic-y, metallic, etc.). Literature investigating  
73 neural mechanisms of material perception has so far heavily focused on how the brain  
74 discriminates between different optical appearances (Komatsu & Goda, 2018). Non-optical  
75 properties, however, can also be conveyed through images: we can infer the 'feel' of soft silk or  
76 fur just by looking at an image of it (Baumgartner et al. 2013, Xiao et al. 2016) owing to  
77 previously formed associations between the different senses when interacting with materials;  
78 over time, specific visual (or auditory, proprioceptive, or olfactory) information becomes

79 associated with specific tactile information and vice versa. It is possible that via this *indirect*  
80 route (Schmidt et al. 2017) mechanical and tactile material qualities like softness, viscosity, and  
81 roughness can be conveyed through optical properties of surfaces and the 3D structure of  
82 visual objects (e.g. Baumgartner et al. 2013; Fleming, 2014, 2017; Fleming et al. 2013; Giesel &  
83 Zaidi, 2013; Ho et al. 2006; van Assen & Fleming 2016; Xiao et al. 2016).

84  
85 But not all material properties can be faithfully conveyed through static images, and most  
86 mechanical material properties become much more vividly apparent with motion: watching a  
87 rubber band stretch, a jelly jitter, and hair bending elicits strong impressions of elasticity,  
88 wobbliness, and softness, respectively. In fact, image motion has been shown to provide  
89 information about material qualities over and above the information available from 2D images  
90 (Doerschner et al. 2011, Schmid & Doerschner 2018; Schmidt et al. 2017). Furthermore,  
91 recognizing materials in natural environments likely entails integrating spatiotemporally  
92 segregated information into coherent percepts, similar to when detecting animate objects  
93 (think of detecting a tiger through long, swaying grass). Given that many brain regions are  
94 sensitive to certain kinds of motion structure (for reviews see Erlikhman et al., 2018; Kourtzi et  
95 al., 2008; Nishida et al., 2018), it is surprising that only very few studies have investigated the  
96 neural mechanisms involved in material perception using dynamic stimuli (but see Okazawa et  
97 al. 2012; Kam et al. 2015; see Sun et al. 2016a for binocular stimuli). These studies investigated  
98 the neural mechanisms of gloss perception using rigid objects. To date, no studies have  
99 examined the cortical processing of nonrigid materials. One possible reason for this is that it is  
100 difficult to find adequate control conditions for such complex, dynamic stimuli. Recent  
101 improvements in computing power and an increased ability to simulate such complex materials  
102 with computer graphics now puts us in a position to tackle this problem.

103  
104 In this study we developed a new class of stimuli for investigating the neural correlates of  
105 material perception, which utilize the fact that mechanical and tactile qualities of materials can  
106 be convincingly conveyed through image motion alone (in Schmid & Doerschner, 2018; Bi et al.,  
107 2019). Previously these have been called point light stimuli by Schmid & Doerschner (2018),

108 analogous to ‘point light walkers’ that have been used extensively in biological motion research  
109 (Johanson, 1973). Similar stimuli have also been called ‘dynamic dot stimuli’ (Bi et al., 2019).  
110 Here, we name our new movie database ‘**dynamic dot materials**’, where specific nonrigid  
111 material types are solely depicted through the motion of black dots on a gray background.  
112 Investigations into biological motion (e.g. Servos et al., 2012) and structure from motion (SfM,  
113 e.g. Orban et al. 1999, Peuskens et al., 2004) suggest that the brain can be very sensitive to  
114 certain structured motion. Yet so far, the neural mechanisms of motion perception has largely  
115 been investigated separately for material and object recognition (Grill-Spector & Weiner, 2014;  
116 Komatsu & Goda, 2018). Here we investigated whether cortical areas exist that show a  
117 preference for non-rigid material motion over other types of motion.

118  
119 Dynamic dot materials not only depict mechanical material properties convincingly, but they  
120 also have several advantages over the static images used in previous work. In particular, they:

- 121 ● isolate dynamic properties from optical cues;
- 122 ● capture non-optical aspects of material qualities, in particular mechanical properties;
- 123 ● provide more stimulus control compared to ‘full cue’ videos - they can be motion-  
124 scrambled and the behavior of trajectories and speed of individual dots can be  
125 manipulated;
- 126 ● allow us to investigate whether areas previously associated with materials (e.g. CoS, e.g.  
127 Cant & Goodale 2007; Cant & Xu, 2012, 2015, 2016; Gallivan et al. 2014; Eck et al., 2016;  
128 Kitada et al. 2014) are indeed specialized for processing visual (optical) properties or  
129 whether they represent material properties more generally;
- 130 ● allow us to investigate whether areas associated with coherent motion preference (e.g.  
131 hMT+/V5 and posterior parietal cortex, e.g. Orban et al. 1999; Peuskens, 2004); show a  
132 preference for specific types of coherent motion (non-rigid vs. rigid)

133  
134 Using fMRI, we investigated which brain regions respond preferentially to these novel dynamic  
135 dot materials versus other types of motions and motion scrambled control stimuli. Anticipating  
136 our results, we find widespread preferential activation for non-rigid material motion. This

137 suggests that dynamic dot materials are very suitable for mapping the cortical network involved  
138 in the perception of material qualities.

139

## 140 **2. Materials & methods**

141

### 142 **2.1. Participants**

143 10 volunteers participated in the experiment (age range: 21-42, 2 males, mean age: 27.3, 1 left  
144 handed). All participants had normal or corrected to normal vision and had no known  
145 neurological disorders. Participants gave their written consent prior to the MR imaging session.  
146 Protocols and procedures were approved by the local ethics committee of Justus Liebig  
147 University Giessen and in accordance with the Code of Ethics of the World Medical Association  
148 (Deklaration of Helsinki).

149

### 150 **2.2. Stimuli**

151 **2.2.1. Dynamic dot materials.** Stimuli were non-rigid materials, generated with Blender  
152 (version 2.7) and Matlab (release 2012a; MathWorks, Natick, MA) and presented using Matlab  
153 and the Psychophysics Toolbox (Brainard, 1997). Each dynamic dot material was a 2s animation  
154 (48 frames) that depicted the deformation of a specific material under force. Object  
155 deformations were simulated using the Particles System physics engines in Blender, with either  
156 the fluid dynamics or Molecular addon (for technical specifications we refer the reader to  
157 Schmid & Doerschner, 2018). For variety, we simulated non-rigid materials with different  
158 mechanical properties under various forces (details shown in Table 1), including cloth flapping  
159 in the wind, liquids rippling and waving, breaking materials of high, medium, and low elasticity,  
160 as well as non-breaking elastic materials. Upon creation of these different material types we  
161 exported the 3D coordinates of each particle at each frame. Using Matlab, we calculated the 2D  
162 projection for each particle from a specific viewing angle. For each material only 200 random  
163 particles were selected for display, as this medium density yielded best perceptual impressions  
164 in previous work (Schmid & Doerschner, 2018), with the remaining particles set to invisible. The  
165 particles were sampled from throughout the volume of the substance with the following

166 exception: for liquids the particles were sampled from the surface because sampling from the  
 167 volume in these cases did not convey the material qualities as convincingly. In total we  
 168 rendered ten animations (Table 1).

169

| <b>Material motion name</b> | <b>Particle physics</b>      | <b>Blender simulation details</b>                                                                                                              | <b>Part of simulation rendered</b>                                   |
|-----------------------------|------------------------------|------------------------------------------------------------------------------------------------------------------------------------------------|----------------------------------------------------------------------|
| cloth                       | Linked, unbreaking particles | A sheet of linked particles was attached at the top of the scene and blown by a wind force field.                                              | Cloth blowing in the wind.                                           |
| cloth_rot                   | Linked, unbreaking particles | Same as cloth.                                                                                                                                 | Cloth movie rotated 90 degrees.                                      |
| ripple                      | Fluid particles              | Fluid particles were dropped into a small round container, causing it to ripple.                                                               | Liquid rippling.                                                     |
| waves                       | Fluid particles              | Fluid particles were dropped into a large square container and stirred by an invisible rod causing larger waves.                               | Liquid waves.                                                        |
| pokeWobble                  | Linked, unbreaking particles | Elastic cube made of linked particles was attached to the ground and poked with an invisible rod.                                              | Cube wobbling.                                                       |
| pokeWobble_rot              | Linked, unbreaking particles | Same as pokeWobble.                                                                                                                            | Cube wobbling, rendered from a different camera angle to pokeWobble. |
| stretchBounce               | Linked, unbreaking particles | Elastic cube made of linked particles was attached to invisible solid walls that moved horizontally apart. Elastic cube stretched and bounced. | Cube stretching and bouncing.                                        |
| stretchWobble               | Linked, breaking particles   | Same as stretchBounce but elastic cube ripped and wobbled like hard jelly.                                                                     | Cube stretching, ripping, and wobbling.                              |
| stretchHighWobble           | Linked, breaking particles   | Same as stretchBounce but elastic cube ripped and wobbled substantially.                                                                       | Cube stretching, ripping, and wobbling.                              |

---

|                  |                            |                                                                                                                     |                                                                                                                     |
|------------------|----------------------------|---------------------------------------------------------------------------------------------------------------------|---------------------------------------------------------------------------------------------------------------------|
| stretchDough_rot | Linked, breaking particles | Same as stretchBounce but the cube was made of low-elastic material that ripped apart softly with no wobble motion. | Cube stretching and ripping. Movie was rotated 90 degrees to provide variation to the other three “stretch” movies. |
|------------------|----------------------------|---------------------------------------------------------------------------------------------------------------------|---------------------------------------------------------------------------------------------------------------------|

---

170 **Table 1: Simulation and rendering details for each material motion animation.** Animations  
171 were 2s clips of materials being deformed in various ways. The first column shows the name of  
172 the movie provided in the Supplementary Material. The second column shows whether each  
173 material was simulated as linked particles (breaking or unbreaking) or fluid particles (see main  
174 text). The third column shows details of how the simulation was set up in Blender. The fourth  
175 column shows what part of the simulation was rendered in the final animation.

176  
177 **2.2.2. Scrambled control stimuli.** We wanted to find cortical regions that are sensitive to  
178 material motion over and above other kinds of motion. That is, we wanted to exclude regions  
179 that are sensitive to motion generally but do not show a preference for material motion.  
180 Therefore we created “scrambled” control stimuli that were matched in motion energy to the  
181 dynamic dot materials (measured as average velocity magnitude, see Supplementary Figure 1).  
182 We created a scrambled version of each material stimulus by shuffling the position of each  
183 particle on the first frame. All dots in the scrambled motion stimuli had the same velocity  
184 magnitude as the material motion; however, the direction of trajectory was rotated by a  
185 random (uniform distribution) amount between 0 and  $2\pi$  every 2nd frame. Without this  
186 rotation the scrambled stimuli would still look like non-rigid materials. The trajectory of a given  
187 dot was forced to remain inside the spatial range of the dynamic dot materials (in the 1st  
188 frame) by forcing it to change its direction if it is outside the boundary. This was accomplished  
189 by rotating the dot trajectory to a different direction. As a consequence, acceleration between  
190 material and control stimuli were not matched (See Supplementary Figure 2). Example  
191 scrambled control stimuli are shown in Figure 1C.

192  
193 **2.2.3. Structure from Motion (SfM) control stimuli.** We also wanted to make sure any  
194 preference for material motion within a brain region was not just a preference for global



195 coherent 3D motion, or “object-ness”. Therefore, we created 3D structure-from-motion control  
196 stimuli. In order to generate these control stimuli, we selected one frame of each material  
197 motion movie and then rotated the camera back and forth around the center of the scene. This  
198 gave the object an appearance of rotating in depth around the horizontal (or vertical axis). SfM  
199 control stimuli are shown in Figure 1C.

200  
201 For each stimulus, coordinates, movies, and individual movie frames can be found in the  
202 database provided with the Supplementary Material (10.5281/zenodo.3820669). [Note that this  
203 link will not work until publication. Reviewers can find database here:  
204 <https://www.dropbox.com/sh/nakqpn022lpaptn/AACQkbsgFuVvUIZlRXnoWXrya?dl=0>].

205

### 206 **2.3. Stimulus display**

207 Visual stimuli were presented on an MR-safe LCD screen placed near the rear end of the  
208 scanner bore (Cambridge Research Systems Ltd, Rochester, UK; resolution: 1920 by 1080;  
209 refresh rate 120 Hz). Participants viewed the screen through an angled mirror attached to the  
210 head-coil while lying supine inside the scanner bore. Total eye-to-screen optical distance was  
211 140 cm, and the screen subtended a visual angle of 28 degrees horizontally at this distance.  
212 Stimuli were presented at the center of the screen and approximately subtended 15.75 by  
213 15.75 degrees visual angle.

214

### 215 **2.4. Fixation task**

216 To ensure fixation during the scanning session, aid maintaining vigilance and wakefulness, and  
217 limit attentional effects, we asked participants to perform a demanding fixation task  
218 throughout the functional runs. In this task, participants were required to report a brief  
219 reduction in the size of the fixation cross via a button press. The cross shrank by a small amount  
220 every 3 seconds with a random (+/- up to 1.5 seconds) time jitter to make it unpredictable  
221 when the shrinking would occur.

222

### 223 **2.5. MR Image Acquisition**

224 Magnetic resonance images were collected on a 3 Tesla MRI scanner (Magnetom Prisma,  
225 Siemens AG, Erlangen, Germany) equipped with a 64-channel head coil in BION imaging center  
226 of JLU Giessen. MR sessions contained a structural run and 4-8 functional runs. Structural  
227 images were acquired using a T1-weighted 3-D anatomical sequence (sagittal MP-RAGE, Spatial  
228 resolution: 1 mm<sup>3</sup> isotropic; number of slices: 176). Functional images were acquired while  
229 participants viewed the visual stimuli and were acquired with a T2\*-weighted gradient-recalled  
230 echo-planar imaging (EPI) sequence (TR: 2000 ms; TE: 30 ms; spatial resolution: 3x3x3 mm<sup>3</sup>;  
231 number of slices: 36; slice orientation: parallel to calcarine sulcus). Each participant took part in  
232 one scanning session that lasted about an hour and a half. During functional runs participant  
233 responses were collected using an MR-safe button box.

234

## 235 **2.6. Experimental Design**

236 During the functional runs, different types of motion stimuli (material, scrambled control, SfM  
237 control) were presented in alternating blocks. The order of blocks was randomized and counter-  
238 balanced. Each block lasted 22 seconds and contained ten short clips (2 s) of animation  
239 separated by 200 ms interstimulus interval (ISI). Figure 1B depicts the experimental protocol.  
240 There were 3 repeats of each stimulus type (material, scrambled control, SfM control) per run,  
241 4-8 runs in a session, thus 12-24 repeats of each stimulus per participant. One run lasted 286  
242 seconds.

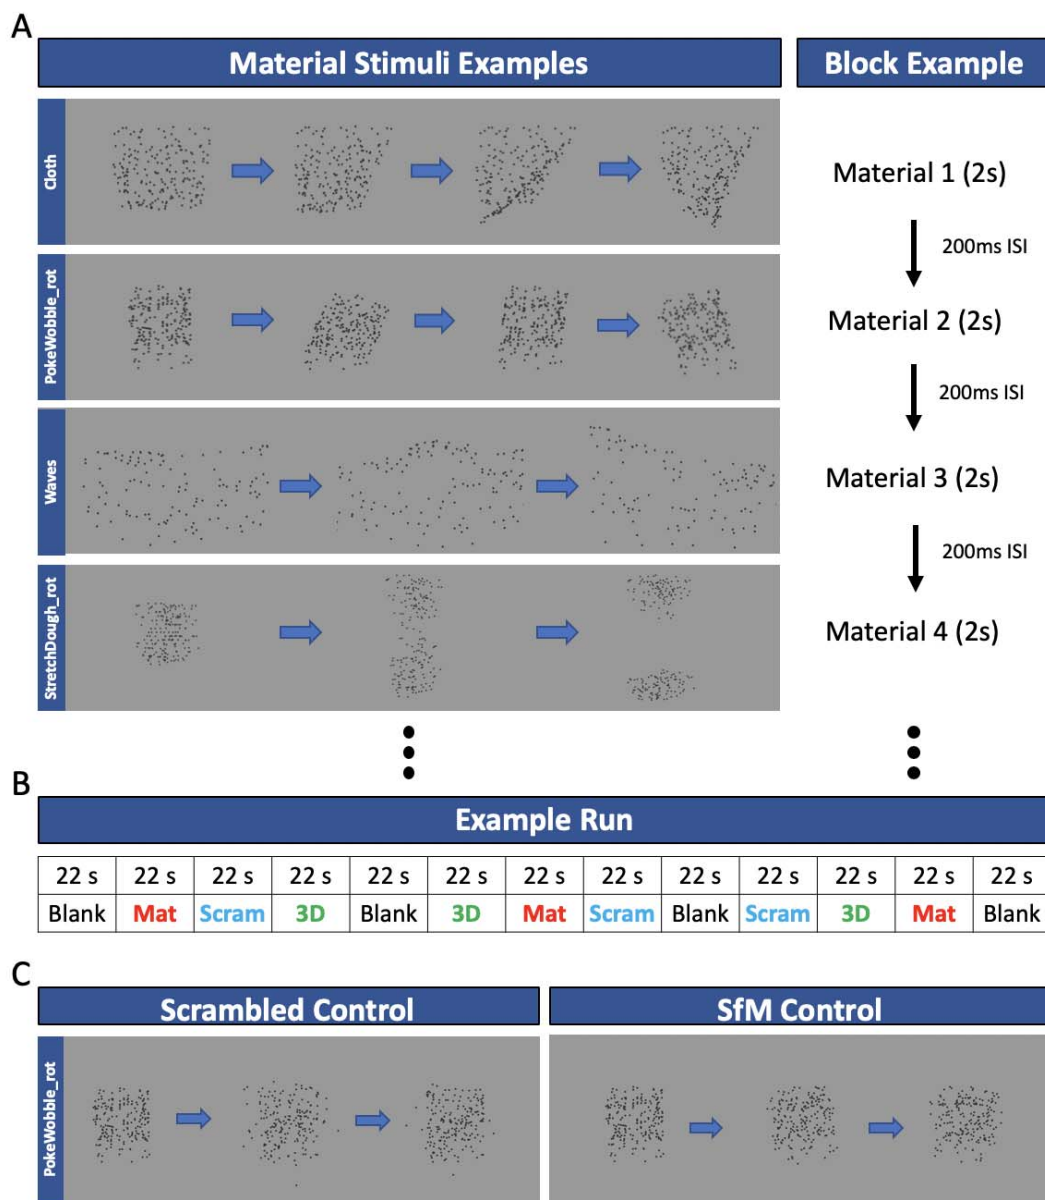

243  
 244 **Figure 1. Example stimuli and block design.** During the functional scans participants were  
 245 presented with alternating blocks of dynamic dot stimuli, motion scrambled control stimuli and  
 246 structure from motion (SfM) control stimuli. On the right side of panel **A** we show selected  
 247 frames of 4 of the 10 possible dynamic dot material animations that were shown in random  
 248 order in a block. On the left side of the same panel the timing of presentation during a dynamic  
 249 dot material block is shown. Panel **B** depicts an example run, and panel **C** shows selected frames  
 250 of 1 of the 10 possible random motion control animations (left) and the SfM control stimuli

251 *(right). The timing during a block of these control conditions was identical to that of dynamic*  
252 *dot material blocks.*

253

## 254 **2.7. MR Data Analysis**

255 All MR image preprocessing and further analyses were performed using BrainVoyager QX,  
256 except an initial inhomogeneity correction step on T1-weighted images, which was conducted  
257 using Freesurfer4 software (<http://surfer.nmr.mgh.harvard.edu/>). After the initial  
258 inhomogeneity correction with Freesurfer4, anatomical images were imported into  
259 BrainVoyager for further preprocessing. Preprocessing for the anatomical images included the  
260 following steps: another inhomogeneity correction using BrainVoyager (for 8 out of 10  
261 participants this led to a better white-gray matter segmentation), aligning the images in AC-PC  
262 plane and converting to Talairach space, white-gray matter segmentation. After these steps a  
263 3D cortical mesh was created for each subject and the resulting individual meshes were  
264 morphed and aligned using cortical surface information (sulci and gyri). Finally an average mesh  
265 was created and inflated. Preprocessing steps on functional images included slice acquisition  
266 time correction, motion correction, linear trend removal and high pass filter (temporal). The  
267 resulting functional images were coregistered with the anatomical images per participant.  
268 Functional data were spatially transformed and projected on the inflated 3D average mesh for  
269 further analyses. These analyses included fixed-effects surface based group analyses using the  
270 general linear model (GLM). Specifically we performed several separate GLM analyses (material  
271 vs. scrambled, material vs. 3D; 3D vs. scrambled) and a conjunction analysis of  
272 (material>scrambled) AND (material>3D). Active voxels were identified at  $qFDR > 0.05$  level  
273 (FDR corrected for multiple comparisons).

274

## 275 **3. Results**

276 Figure 2 shows the results of the whole-brain GLM analyses. The activation maps on the left  
277 and on the right show that, overall, there are many cortical areas that have a larger BOLD  
278 response to dynamic dot materials (yellow) than to scrambled motion stimuli. Moreover,  
279 cortical areas with a material “preference” appear to constitute a superset of those that

280 respond to 3D motion (Figure 2, left panel, showing areas - in orange - that respond more to 3D  
281 rigid motion than to scrambled stimuli). The overlap in activation for these two contrasts  
282 (material vs. scrambled and 3D vs. scrambled) is perhaps not surprising because 3D rigid motion  
283 could simply be a special type of material motion and thus activity to this type of stimuli should  
284 be contained within the general material motion network. The fact that rigid motion is a  
285 subclass of all possible material motions might also explain why cortical responses to dynamic  
286 dot materials are almost always stronger than those to 3D motion (Figure 2, right panel, orange  
287 color maps): seeing just one type of material motion is likely to cause a relatively weaker  
288 cortical response than the rich set of motions that occur in the dynamic dot condition. We also  
289 found these patterns of activation at the individual participant level (Supplementary Figure 3).  
290 The average accuracy in the fixation task was 83% across observers, suggesting that participants  
291 followed our instructions and fixated at the center of the screen during presentation of the  
292 stimuli.  
293

294

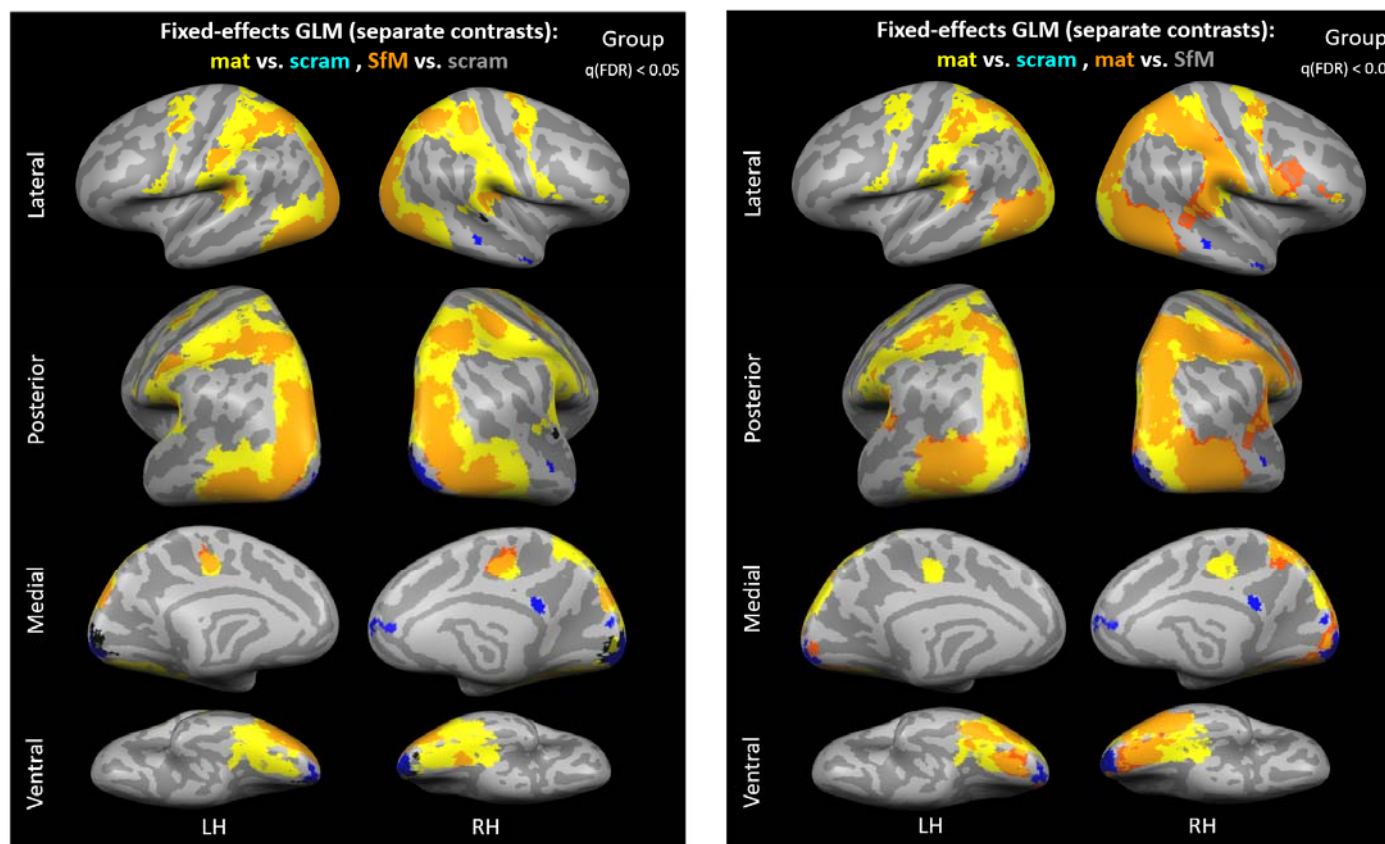

295 **Figure 2. GLM group analyses.** *The left panel shows the results of the GLM contrasting average*  
296 *BOLD responses to dynamic dot materials with those to scrambled motion stimuli (yellow-blue),*  
297 *overlaid together with results of a GLM analysis that contrasts average BOLD responses to 3D*  
298 *rigid motion with those to scrambled stimuli (orange-black). The resulting activity maps suggest*  
299 *that cortical areas that respond strongly to material motion are a superset of those that*  
300 *respond to 3D rigid motion. In the right panel we plot the results of the same dynamic dot*  
301 *materials vs scrambled motion contrast (yellow-blue) together with a GLM contrast of dynamic*  
302 *dot materials versus 3D rigid motion (SfM; orange-black). Here, we see that responses to*  
303 *dynamic dot materials were almost always stronger than those to 3D rigid motion (SfM) stimuli.*  
304 *See text for further details. Overall, we see that lower visual areas tended to respond stronger to*  
305 *the scrambled motion stimuli. This is consistent with the literature (e.g. Murray et al. 2002).*

306  
307 A subsequent conjunction analysis confirmed that there is a widespread network of brain areas  
308 whose BOLD response is stronger for dynamic dot stimuli compared to other types of motion  
309 (scrambled and 3D rigid motion), including dorsal and ventral visual regions in addition to  
310 multisensory, somatosensory, and premotor areas (Figure 3). Only early visual areas respond  
311 more strongly to the two control motions (blue squares labelled 1). This is in line with our  
312 motion energy measurements of the stimuli (Supplementary Figures 1 and 2) and suggests that  
313 higher activation for material versus control motion in other regions is not due to low-level  
314 differences in motion energy between the conditions. Broadly, the stronger response for  
315 material motion versus scrambled and 3D rigid motion (SfM) encompasses ventral visual  
316 regions (grey squares labelled 2); occipito-temporal and -parietal regions (yellow squares  
317 labelled), dorsal visual and multisensory regions (orange squares labelled 4), somatosensory  
318 and multisensory regions (though not primary somatosensory cortex; red squares labelled 5),  
319 superior temporal regions (green squares labelled 6) and pre-motor regions (purple squares  
320 labelled 7). We will discuss these results next.

321

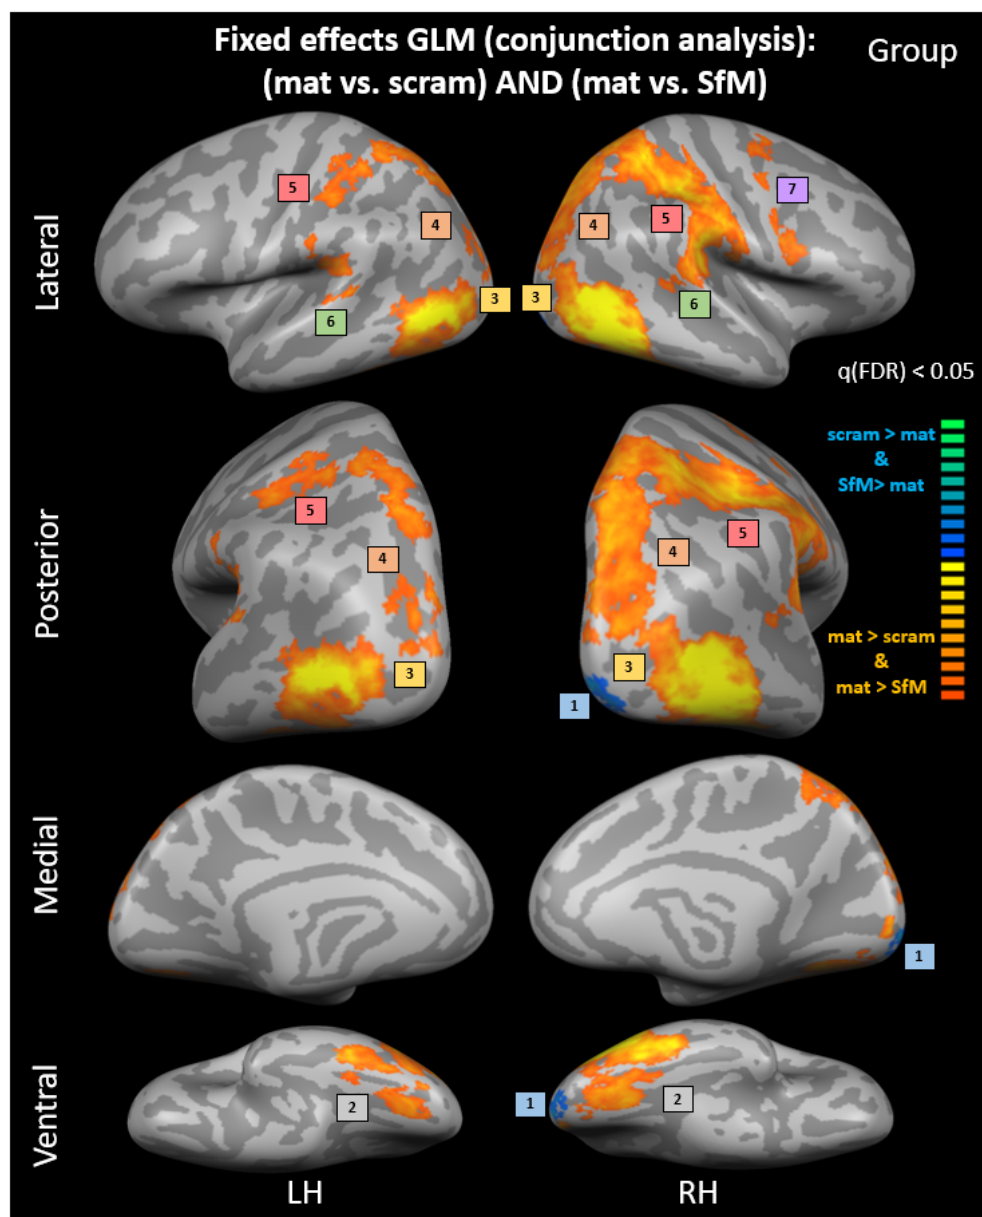

322  
323 **Figure 3. Conjunction analysis.** Cortical areas that respond stronger (hot colors) and weaker  
324 (cool colors) to material motion compared to both 3D motion (SfM) and scrambled motion. Only  
325 early visual areas respond more weakly to material motion (1. Blue squares). A large network of  
326 areas are more strongly active under the material motion condition. Broadly the network  
327 encompasses ventral visual regions (2. Grey squares); occipito-temporal and -parietal regions (3.  
328 Yellow squares), dorsal visual and multisensory regions (4. Orange squares), somatosensory and  
329 multisensory regions (5. Red squares); superior temporal regions (6. Green squares) and pre-  
330 motor regions (7. Purple squares).

331

#### 332 **4. DISCUSSION**

333 *Dynamic dot materials* are a novel class of stimuli that convey the non-optical properties of  
334 material qualities purely on the basis of 2D image motion patterns. Here, we introduced a  
335 database of various types of non-rigid materials, though other materials (e.g. rigid, breakable  
336 substances) can also be rendered convincingly by the means of this technique (e.g. see Schmid  
337 & Doerschner, 2018). In their creation, these stimuli are conceptually closely related to “point  
338 light walkers” (Johansson, 1973), where the motion of small light sources affixed to different  
339 parts of limbs of biological species can elicit a very vivid impression of animacy. Similarly, we  
340 “attached” small dots to an otherwise invisible substance and recorded the motion of these  
341 dots while the material reacted to a force. How individual materials change their shape in  
342 response to a force strongly depends on their mechanical properties, and it is this idiosyncratic  
343 change of shape information that appears to convey mechanical qualities of a material. It would  
344 be very interesting to pin-point exactly the motion characteristics that elicit a particular  
345 material quality (Schmid & Doerschner, 2018; also see Bi et al. 2019), just as it has been done in  
346 the field of biological motion where researchers have tried to understand what it is that makes  
347 point light walkers look “biological” (Troje, 2013). In fact, all biological motion is also non-rigid  
348 motion, so our stimuli could be suitable for teasing apart the contributions of these two factors  
349 to neural activity observed while watching biological motion stimuli. Our stimuli could help to  
350 discover the perceptual boundary between non-rigid animate and inanimate objects, and to  
351 investigate corresponding neural maps and mechanisms (Long, Yu, Konkle, 2018; Grill-Spector  
352 & Weiner, 2014). Dynamic dot materials could also be used to investigate whether areas  
353 previously associated with materials (e.g. CoS, e.g. Cant & Goodale 2007; Cant & Xu, 2012,  
354 2015, 2016; Gallivan et al. 2014; Eck et al., 2016; Kitada et al. 2014) are indeed specialized for  
355 processing visual (optical) properties or whether they represent material properties more  
356 generally. Our results so far suggest the latter, but further investigation, for example using a  
357 multivariate design and analysis approach, would allow one to better test this (Schmid &  
358 Doerschner, 2019). The fact that the location, direction and speed of individual dots in our



359 stimuli can be manipulated, renders investigations of research questions like these more  
360 feasible.

361

#### 362 **4.1 Relation to previous work**

363 Using these novel stimuli in an fMRI experiment we found robust and widespread increased  
364 activation across the human brain in response to *dynamic dot materials* when compared to  
365 activation in response to other types of motion stimuli (Figure 3). Regions preferring dynamic  
366 dot materials included several areas in occipito-temporal and, -parietal cortices, secondary  
367 somatosensory cortex, and premotor regions. Ventral visual areas (labelled 2 in Figure 3) have  
368 previously been implicated in the processing of surfaces and textures in static scenes (Cant &  
369 Goodale, 2007; Cavina-Pratesi et al. (2010a, 2010b); Hiramatsu et al., 2011). Occipito-temporal  
370 and -parietal areas include motion-, object-, face-, and place-selective areas (Grill-Spector &  
371 Malach, 2004). Posterior parietal areas (labelled 4) are sensitive to aspects of 3D shape,  
372 structure-from-motion, optic flow, multisensory information, and visuomotor control (Culham,  
373 et al., 2006; Erlikhman et al., 2018; Uesaki & Ashida, 2015). Recently it has been found that  
374 activity patterns in secondary somatosensory cortex (labelled 5) could reliably discriminate  
375 visual properties, such as surface gloss and roughness (Sun et al., 2016b). Greater responses to  
376 biological versus scrambled point-light stimuli have been found in superior temporal areas  
377 (labelled 6) and premotor areas (labelled 7) (Saygin et al., 2004). Note that the higher responses  
378 for material versus the two control motions does *not* include primary somatosensory nor  
379 primary motor cortices, but does encompass secondary somatosensory, multisensory, and  
380 premotor areas, in addition to nearly all extrastriate regions that are responsive to visual  
381 stimuli.

382

383 Given the properties of our stimuli, a widespread cortical preference is perhaps expected: our  
384 stimuli are objects (LOC, e.g. Grill-Spector & Malach, 2004), they are non-rigidly moving  
385 structures (e.g. hMT+, MST, PPC, e.g. see review by Erlikhman, et al., 2018; STS, e.g. Saygin et  
386 al., 2004), they elicit a distinct tactile experience (e.g. Schmid & Doerschner, 2018; Bi et al.,  
387 2019), and such tactile experiences of material qualities are often associated with certain

388 optical material qualities (CoS, e.g. Arnott et al., 2008; Podrebarac et al., 2014; Sun et al.,  
389 2016b; and see Komatsu & Goda, 2018 for a review). The widespread activation in response to  
390 quite sparse stimuli also suggests that material perception must be an inherently distributed  
391 process (see Schmid & Doerschner 2019). Consistent with this idea, there is a growing body of  
392 literature suggesting that object category representations are grounded in distributed networks  
393 (e.g. Kravitz et al., 2011; 2013; Martin, 2016).

394  
395 Discovering a network of preferentially more active areas during dynamic dot material viewing  
396 does not mean that all of these areas must be involved in the recognition and differentiation of  
397 materials: to find such finer-tuned responses would require further studies, and our stimuli  
398 provide a convenient way to investigate this. , as discussed next.

399

#### 400 **4.2. Advantages of studying cortical responses to visually presented materials**

401 Materials are inherently multidimensional in that they have multiple stimulus properties in  
402 multiple perceptual dimensions, and they are inherently multimodal in that their properties can  
403 be inferred through multiple modalities. For example, a velvet cloth looks soft (optical  
404 properties), moves (visual mechanical motion) and folds (visual 3D shape) in a way that  
405 suggests that it is soft, but it also feels soft to the touch (tactile). This multidimensionality and  
406 multimodality makes materials the ideal candidate to develop experimental designs that can  
407 help to understand computational architecture of the cortical representations involved in  
408 recognition. As an example, if a cortical region represents material/object category A based on  
409 visual property X but not the same category based on the visual property Y then this suggests  
410 that this region encodes the visual property X but not the category. Conversely, if this cortical  
411 region has a shared representational structure, i.e. category A is encoded through both visual  
412 properties X and Y, then it likely encodes the concept. Thus, investigating neural responses to  
413 stimuli, like the dynamic dot materials proposed here, we may be able to tease apart the direct  
414 encoding of visual properties from the indirect activation of associated properties (Schmid &  
415 Doerschner, 2019). Note that we are referring to a generic kind of association between  
416 properties; we did not find a preference for material motion in cortical regions involved in

417 memory or contextual associations, such as the angular gyrus, medial parietal cortex, or  
418 anterior parahippocampal cortex (Kravitz et al., 2013; Bar et al., 2008).

419

## 420 **5. Conclusion**

421 Dynamic dot materials are a novel class of stimuli that convey non-optical properties of  
422 material qualities purely on the basis of 2D image motion patterns. Our results act as a proof of  
423 principle that such stimuli can be used for mapping the cortical network involved in the  
424 perception of material qualities. From a broader perspective, owing to their inherently  
425 multidimensional and multimodal nature, materials are a unique type of stimulus that can help  
426 neuroimaging research to advance our understanding of the computational architecture of the  
427 cortical representations involved in recognition.

428

## 429 **6. Acknowledgements**

430 This work was supported by a Sofja Kovalevskaja Award endowed by the German Federal  
431 Ministry of Education; a Marie Skłodowska-Curie Action – Innovative Training Network (MSCA-  
432 ITN/ETN) Grant, DyViTo: Dynamics in Vision and Touch – the look and feel of stuff. We thank  
433 Chris Baker for helpful comments on earlier versions of this manuscript.

434

435 **7. References**

- 436 Arnott SR, Cant JS, Dutton GN, Goodale MA (2008) Crinkling and crumpling: an auditory  
437 fMRI study of material properties. *NeuroImage* 43:368-378.
- 438 Bar M, Aminoff E, Schacter, D (2008) Scenes unseen: The parahippocampal cortex  
439 intrinsically subserves contextual associations, not scenes of places per se. *The*  
440 *Journal of Neuroscience* 28(34): 8539-8544. DOI:10.1523/JNEUROSCI.0987-08.2008
- 441 Baumgartner E, Wiebel CB, Gegenfurtner KR (2013) Visual and Haptic Representations of  
442 Material Properties. *Multisensory Research* 26: 429–55.  
443 <https://doi.org/10.1163/22134808-00002429>.
- 444 Bi, W, Jin, P, Nienborg, H, Xiao, B (2020) Manipulating patterns of dynamic deformation  
445 elicits the impression of cloth with varying stiffness. *Journal of Vision*, 19(5):18: 1-18.  
446 <https://doi.org/10.1167/19.5.18>
- 447 Cant JS, and Goodale MA (2007) Attention to Form or Surface Properties Modulates  
448 Different Regions of Human Occipitotemporal Cortex. *Cerebral Cortex* 17, no. 3: 713–  
449 31. <https://doi.org/10.1093/cercor/bhk022>.
- 450 Cant JS, Xu Y (2012) Object ensemble processing in human anterior- medial ventral visual  
451 cortex. *Journal of Neuroscience* 32:7685–7700.
- 452 Cant JS, Xu Y (2015) The impact of density and ratio on object- ensemble representation in  
453 human anterior-medial ventral visual cortex. *Cerebral Cortex* 25:4226–4239.
- 454 Cant JS, Xu Y (2016) The contribution of object shape and surface properties to object  
455 ensemble representation in anterior-medial ventral visual cortex. *Journal of Cognitive*  
456 *Neuroscience* 29:398–412.

- 457 Cavina-Pratesi, C Kentridge, RW, Heywood, CA, Milner, AD (2010a) Separate processing of  
458 texture and form in the ventral stream: evidence from fMRI and visual agnosia.  
459 *Cerebral Cortex*, 20: 433-446. doi:10.1093/cercor/bhp111
- 460 Cavina-Pratesi, C, Kentridge, RW, Heywood, CA, Milner, AD (2010b) Separate channels for  
461 processing form, texture, and colour: evidence from fMRI adaptation and visual  
462 object agnosia. *Cerebral Cortex*, 20: 2319-2332. Doi:10.1093/cercor/bhp298
- 463 Culham, JC, Cavina-Pratesi, C, Singhal, A (2006) The role of parietal cortex in visuomotor  
464 control: What have we learned from neuroimaging? *Neuropsychologia* 44, 2688-2684.  
465 doi:10.1016/j.neuropsychologia.2005.11.003
- 466 Doerschner K, Fleming RW, Yilmaz O, Schrater PR, Hartung B, Kersten DJ (2011) Visual  
467 Motion and the Perception of Surface Material." *Current Biology* 21, no. 23: 2010–16.  
468 <https://doi.org/10.1016/j.cub.2011.10.036>
- 469 Eck J, Kaas AL, Mulders JL, Hausfeld L, Kourtzi Z, and Goebel R (2016) The Effect of Task  
470 Instruction on Haptic Texture Processing: The Neural Underpinning of Roughness and  
471 Spatial Density Perception. *Cerebral Cortex* 26, no. 1: 384–401.  
472 <https://doi.org/10.1093/cercor/bhu294>
- 473 Erlikhman G, Gurariy G, Mruczek REB, Caplovitz GP (2016) The Neural Representation of  
474 Objects Formed through the Spatiotemporal Integration of Visual Transients.  
475 *NeuroImage* 142 (2016): 67–78. <https://doi.org/10.1016/j.neuroimage.2016.03.044>
- 476 Fleming RW, Wiebel CB, Gegenfurtner KR (2013) Perceptual Qualities and Material Classes.  
477 *Journal of Vision* 13, no. 8: 1–20. <https://doi.org/10.1167/13.8.9>
- 478 Fleming RW (2014) Visual Perception of Materials and Their Properties. *Vision Research*  
479 94: 62–75. <https://doi.org/10.1016/j.visres.2013.11.004>
- 480 Fleming RW (2017) Material Perception. *Annual Review of Vision Science*, 3: 365-388.  
481 <https://doi.org/10.1146/annurev-vision-102016-061429>

- 482 Gallivan JP, Cant JS, Goodale MA, Flanagan JR (2014) Representation of Object Weight in  
483 Human Ventral Visual Cortex. *Current Biology* 24, no. 16: 1866–73.  
484 <https://doi.org/10.1016/j.cub.2014.06.046>.
- 485 Giesel M, Zaidi Q (2013) Frequency-Based Heuristics for Material Perception.” *Journal of*  
486 *Vision* 13, no. 14: 7–7. <https://doi.org/10.1167/13.14.7>.
- 487 Grill-Spector K, Weiner KS (2014) The Functional Architecture of the Ventral Temporal  
488 Cortex and Its Role in Categorization. *Nature Reviews Neuroscience* 15, no. 8: 536–48.  
489 <https://doi.org/10.1038/nrn3747>.
- 490 Grill-Spector K, Malach R (2004) The human visual cortex. *Annual Review of Neuroscience*  
491 27: 649–77. <https://doi.org/10.1146/annurev.neuro.27.070203.144220>.
- 492 Ho YX, Landy MS, Maloney LT (2006) How Direction of Illumination Affects Visually  
493 Perceived Surface Roughness. *Journal of Vision* 6, no. 5: 8.  
494 <https://doi.org/10.1167/6.5.8>.
- 495 Hiramatsu, C, Goda, N, Komatsu, H (2011) Transformation from image-based to perceptual  
496 representation of materials along the human ventral visual pathway. *NeuroImage*, 57:  
497 482-494. Doi:10.1016/j.neuroimage.2011.04.056
- 498 Johansson G (1973) Visual perception of biological motion and a model for its analysis.  
499 *Perception & Psychophysics* 14, 201–211. <https://doi.org/10.3758/BF03212378>
- 500 Kam TE, Mannion DJ, Lee SW, Doerschner K, Kersten DJ (2015) Human Visual Cortical  
501 Responses to Specular and Matte Motion Flows. *Frontiers in Human Neuroscience* 9:  
502 579. <https://doi.org/10.3389/fnhum.2015.00579>.
- 503 Kitada R, Sasaki AT, Okamoto Y, Kochiyama T, Sadato N (2014) Role of the precuneus in the  
504 detection of incongruency between tactile and visual texture information: a  
505 functional MRI study. *Neuropsychologia* 64:252-262.

- 506 Komatsu H, Goda N (2018) Neural Mechanisms of Material Perception: Quest on  
507 Shitsukan. *Neuroscience*. <https://doi.org/10.1016/J.NEUROSCIENCE.2018.09.001>
- 508 Kourtzi, Z, Krekelberg, B, van Wezel, JA (2008) Linking form and motion in the primate  
509 brain. *Trends in Cognitive Sciences*, 12(6): 230-236.
- 510 Kravitz, DJ, Saleem, KS, Baker, CI, Mishkin, M (2011) A new neural framework for  
511 visuospatial processing. *Nature Reviews Neuroscience*, 12: 217-230.  
512 [doi:10.1038/nrn3008](https://doi.org/10.1038/nrn3008)
- 513 Kravitz, DJ, Saleem, KS, Baker, CI, Ungerleider, LG, Mishkin, M (2013). *Trends in Cognitive*  
514 *Sciences*, 17(1): 26-49. <http://dx.doi.org/10.1016/j.tics.2012.10.011>
- 515 Long B, Yu CP, Konkle T (2018) Mid-Level Visual Features Underlie the High-Level  
516 Categorical Organization of the Ventral Stream. *Proceedings of the National Academy*  
517 *of Sciences* 115, no. 38: E9015–24. <https://doi.org/10.1073/pnas.1719616115>.
- 518 Martin, A. (2016) GRAPES—Grounding Representations in Action, Perception, and Emotion  
519 Systems: How Object Properties and Categories Are Represented in the Human  
520 Brain.” *Psychonomic Bulletin and Review* 23, no. 4: 979–90.  
521 <https://doi.org/10.3758/s13423-015-0842-3>.
- 522 Murray SO, Kersten D, Olshausen BA, Schrater P, Woods DL (2002) Shape perception  
523 reduces activity in human primary visual cortex. *PNAS*, 99, 15164-15169.
- 524 Nishida, S, Kawabe, T, Sawayama, M, Fukiage, T (2018). Motion perception: from detection  
525 to interpretation. *Annual Review of Vision Science*, 4(20): 1-23.  
526 <https://doi.org/10.1146/annurev-vision-091517->
- 527 Okazawa G, Goda N, Komatsu H (2012) Selective Responses to Specular Surfaces in the  
528 Macaque Visual Cortex Revealed by fMRI.” *NeuroImage* 63, no. 3 (2012): 1321–33.  
529 <https://doi.org/10.1016/j.neuroimage.2012.07.052>.

- 530 Orban GA, Sunaert S, Todd JT, Van Hecke P, Marchal G (1999) Human cortical regions  
531 involved in extracting depth from motion. *Neuron*. Dec;24(4):929-940. DOI:  
532 10.1016/s0896-6273(00)81040-5
- 533 Paulun VC, Schmidt F, van Assen JJR, Fleming RW (2017) Shape, Motion, and Optical Cues  
534 to Stiffness of Elastic Objects. *Journal of Vision* 17, no. 1: 20.  
535 <https://doi.org/10.1167/17.1.20>
- 536 Peuskens H, Claeys KG, Todd JT, Norman JF, Van HP, Orban GA (2004) Attention to 3-D  
537 Shape, 3-D Motion, and Texture in 3-D Structure from Motion Displays. *J.Cogn*  
538 *Neurosci.* 16, no. 4: 665–82. <https://doi.org/10.1162/089892904323057371>
- 539 Podrebarac SK, Goodale MA, Snow JC (2014) Are visual texture- selective areas recruited  
540 during haptic texture discrimination? *NeuroImage* 94: 129-137.
- 541 Saygin, AP, Wilson, SM, Hagler, DJJ, Bates, E, Sereno, MI (2004). Point-light biological  
542 motion perception activates human premotor cortex. *The Journal of Neuroscience*,  
543 24(27): 6181-6188. DOI:10.1523/JNEUROSCI.0504-04.2004
- 544 Schmid AC, Doerschner K (2018) Shatter and Splatter: The Contribution of Mechanical and  
545 Optical Properties to the Perception of Soft and Hard Breaking Materials. *Journal of*  
546 *Vision* 18, no. 1: 14. <https://doi.org/10.1167/18.1.14>
- 547 Schmid AC, Doerschner K (2019) Representing stuff in the human brain. *Current Opinion in*  
548 *Behavioral Sciences*, 30, 178–185. <https://doi.org/10.1016/j.cobeha.2019.10.007>
- 549 Schmidt F, Paulun VC, van Assen JJR, Fleming RW (2017) Inferring the stiffness of  
550 unfamiliar objects from optical, shape, and motion cues. *Journal of Vision*, 17(3):18.  
551 doi: 10.1167/17.3.18
- 552 Servos P, Osu R, Santi A, Kawato M (2002) The Neural Substrates of Biological Motion  
553 Perception: an fMRI Study, *Cerebral Cortex*, Volume 12, Issue 7, Pages 772–782,  
554 <https://doi.org/10.1093/cercor/12.7.772>



- 555 Sun HC, Di Luca M, Ban H, Murry A, Fleming RW, Welchman AE (2016a) Differential  
556 Processing of Binocular and Monocular Gloss Cues in Human Visual Cortex. *Journal of*  
557 *Neurophysiology*, <http://jn.physiology.org/content/jn/115/6/2779.full.pdf>
- 558 Sun, HC, Welchman, AE, Chang, DHF, Di Luca, M. (2016b). Look but don't touch: visual cues  
559 to surface structure drive somatosensory cortex. *Neuroimage*, 128: 353-361.  
560 <http://dx.doi.org/10.1016/j.neuroimage.2015.12.054>
- 561 Troje N (2013) What Is Biological Motion? Definition, Stimuli, and Paradigms. In:  
562 Rutherford, M. D. and Kuhlmeier, V. A. (eds.) *Social Perception: Detection and*  
563 *Interpretation of Animacy, Agency, and Intention*. MIT Press. 13 - 36.  
564 [10.7551/mitpress/9780262019279.003.0002](https://doi.org/10.7551/mitpress/9780262019279.003.0002).
- 565 Uesaki, M, Ashida, H (2015) Optic-flow selective cortical sensory regions associated with  
566 self-reported states of vection. *Frontiers in Psychology*. 6(775), 1-9. doi:  
567 [10.3389/fpsyg.2015.00775](https://doi.org/10.3389/fpsyg.2015.00775)
- 568 van Assen J JR, Fleming R W (2016) Influence of optical material properties on the  
569 perception of liquids. *Journal of Vision*, 16(15), 12. <https://doi.org/10.1167/16.15.12>
- 570 Xiao B, Bi W, Jia X, Wei H, Adelson EH (2016) Can You See What You Feel? Color and  
571 Folding Properties Affect Visual–Tactile Material Discrimination of Fabrics. *Journal of*  
572 *Vision* 16, no. 3 (February 23, 2016): 34. <https://doi.org/10.1167/16.3.34>
